# Supplementary material for: Candidate kinases for adipogenesis and osteoblastogenesis from human bone marrow mesenchymal stem cells
Source: Royal Society of Chemistry journal article supplement (doi:10.1039/d1mo00160d), 2021-07-27

AD-PRKG2-6

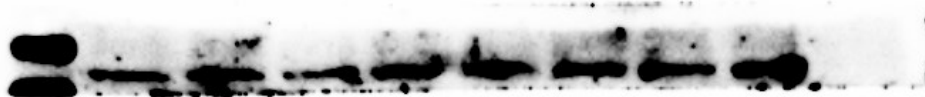

AD-PRKG2-6

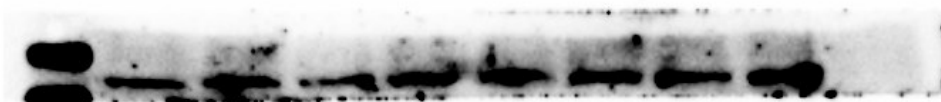

AD-PRKG2-ACTB-4

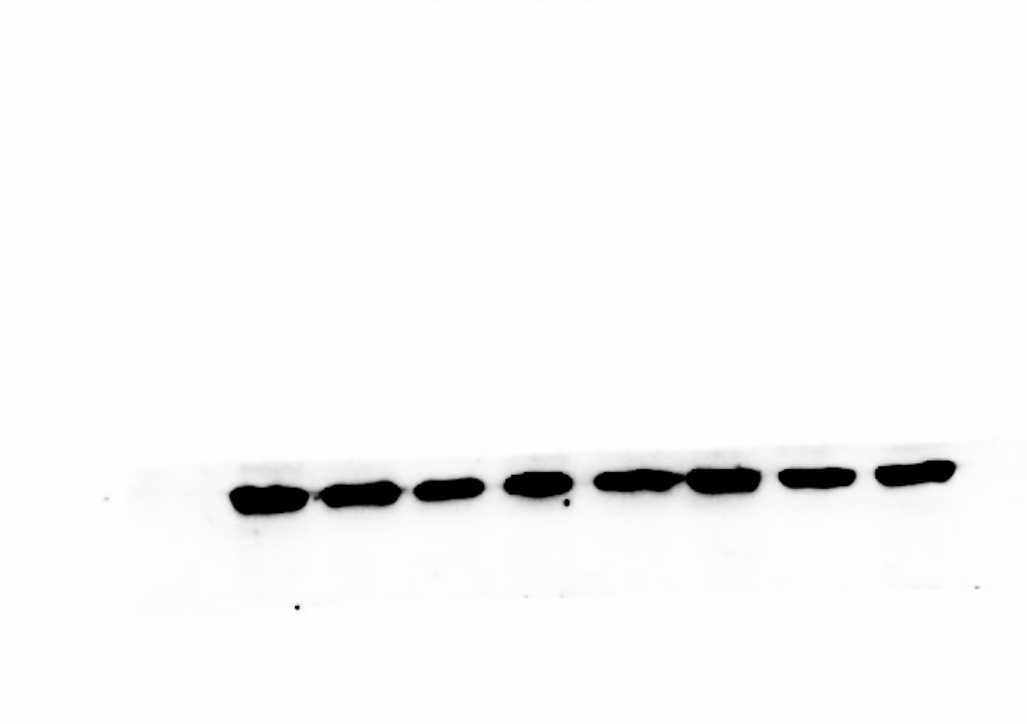

AD-PRKG2-PPARG-4

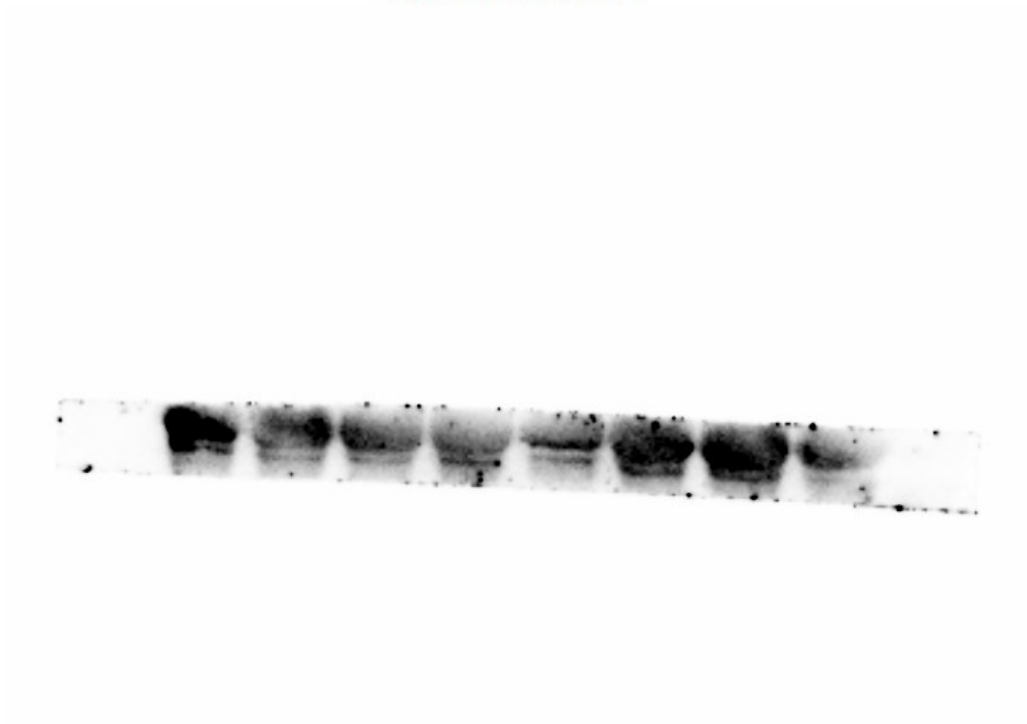

AD-PTK2B-1

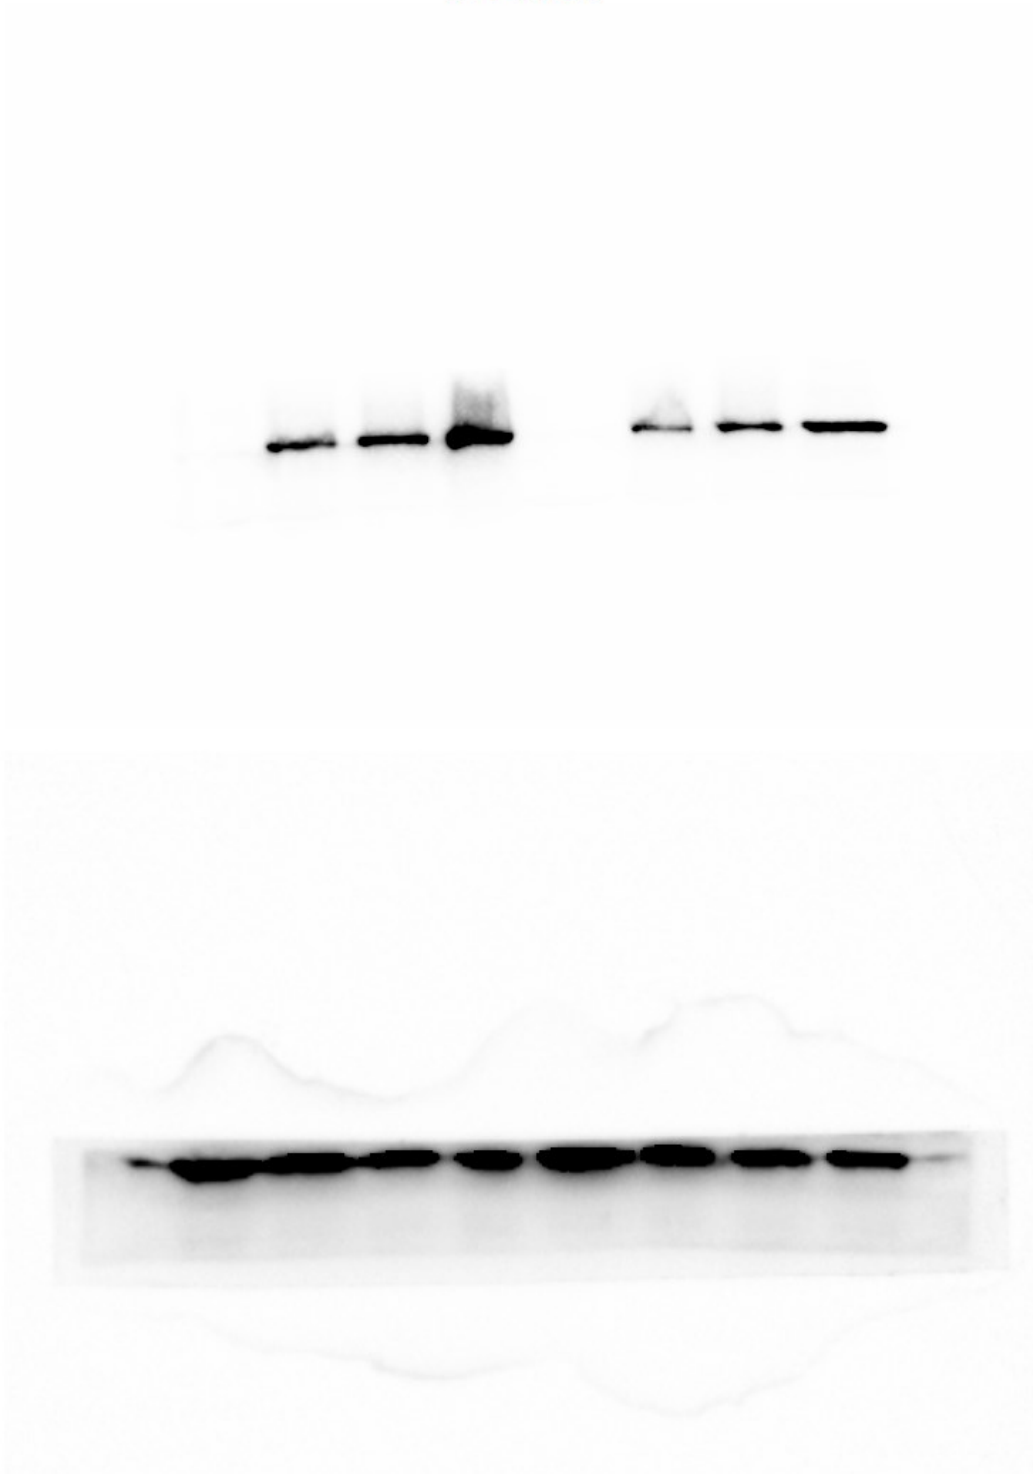

AD-PTK2B-PPARG-5

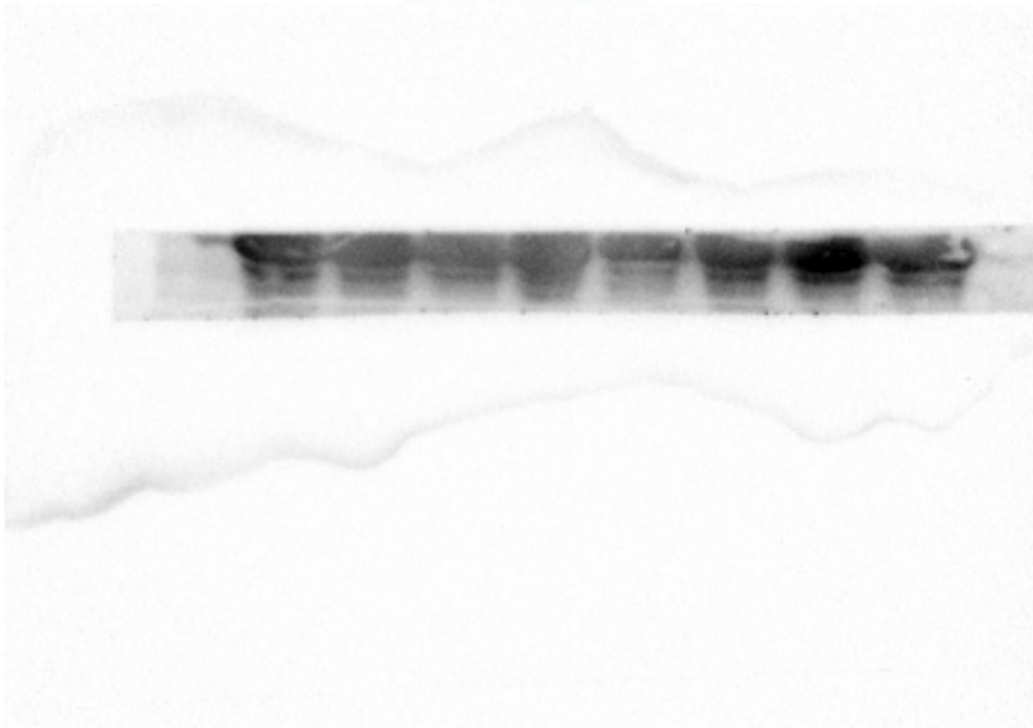

OB-PRKG2-1

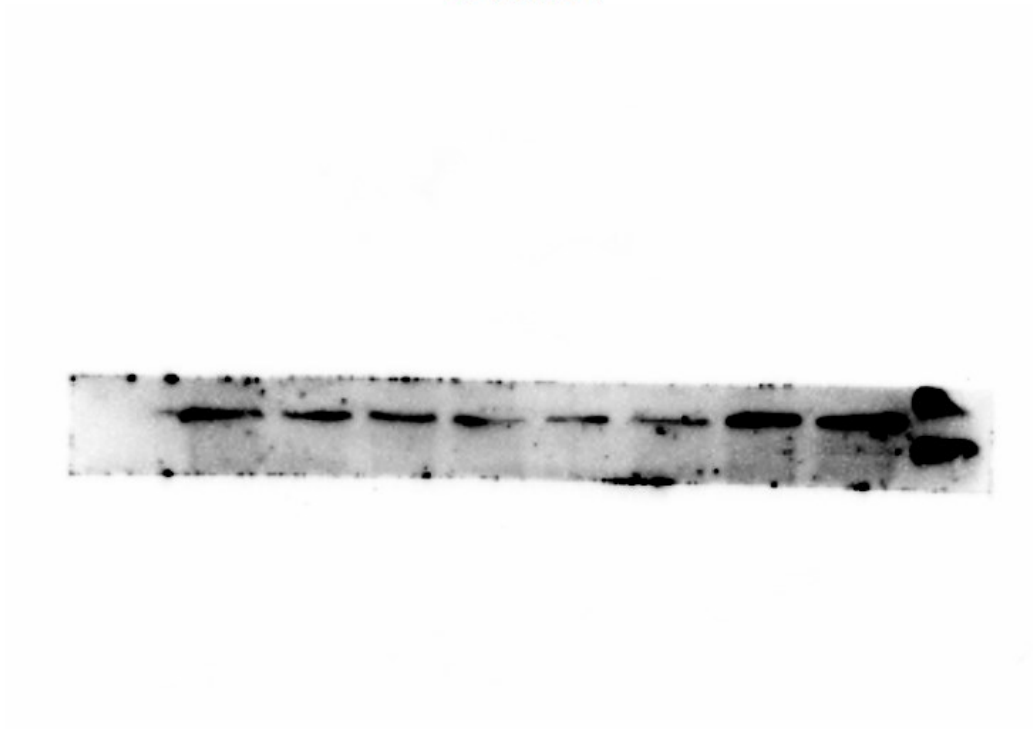

OB-PRKG2-ACTB-2

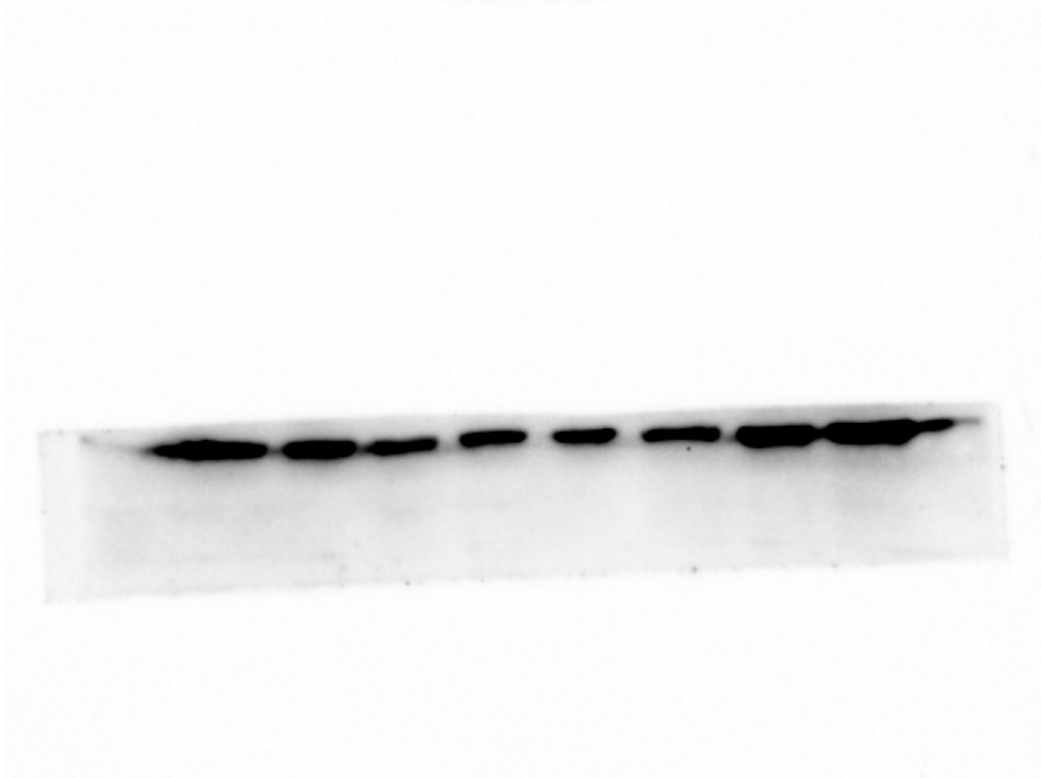

OB-PRKG2-RUNX2-2

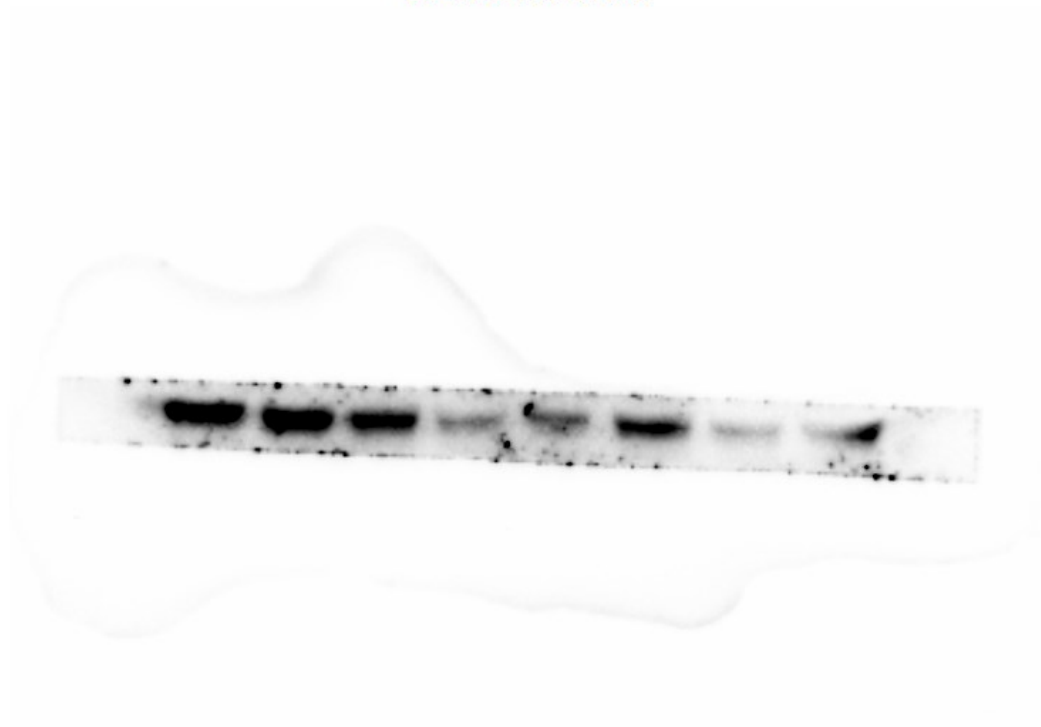

OB-PTK2B-5

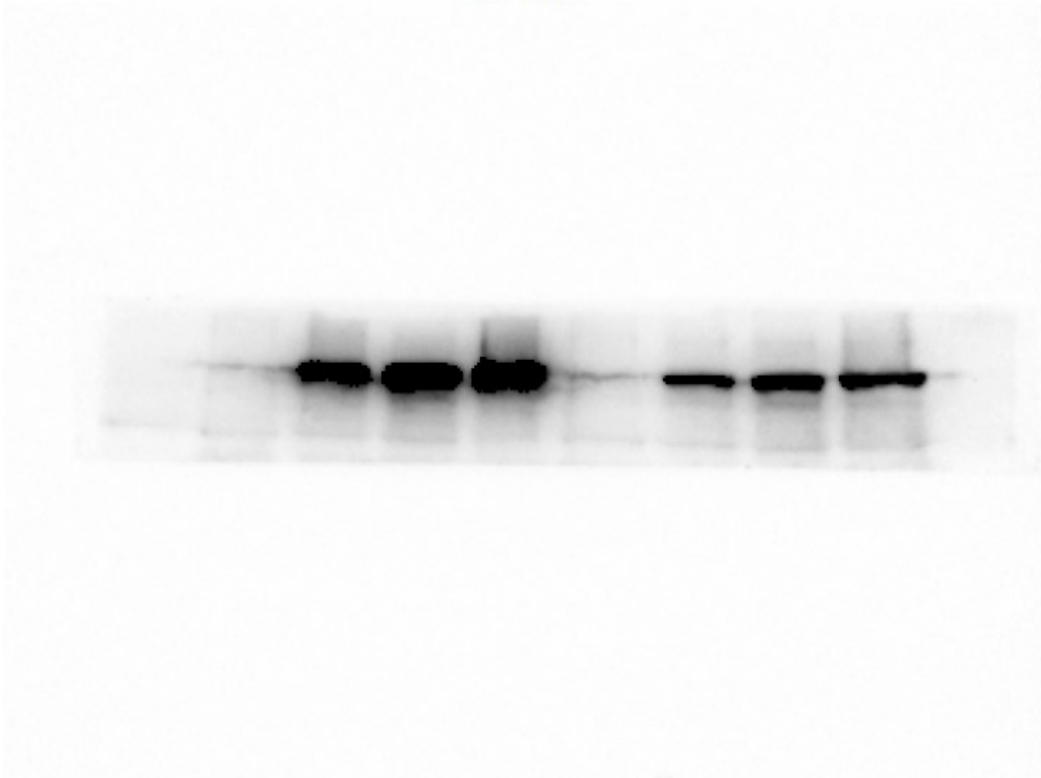

OB-PTK2B-ACTB-3

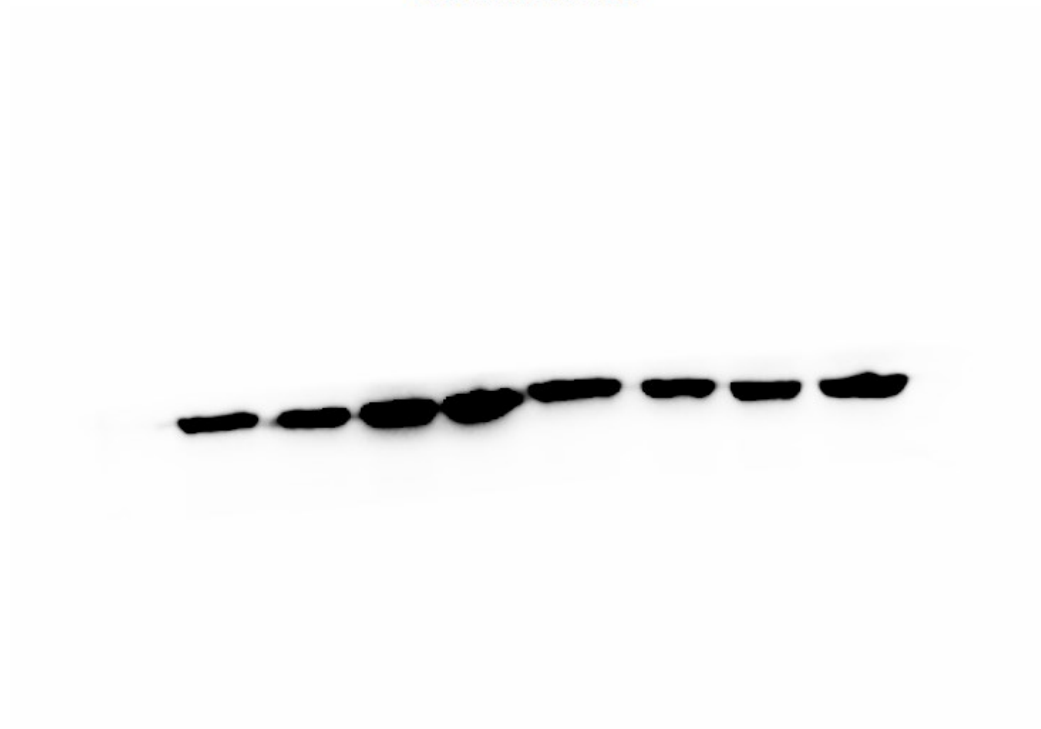

OB-PTK2B-RUNX2-5

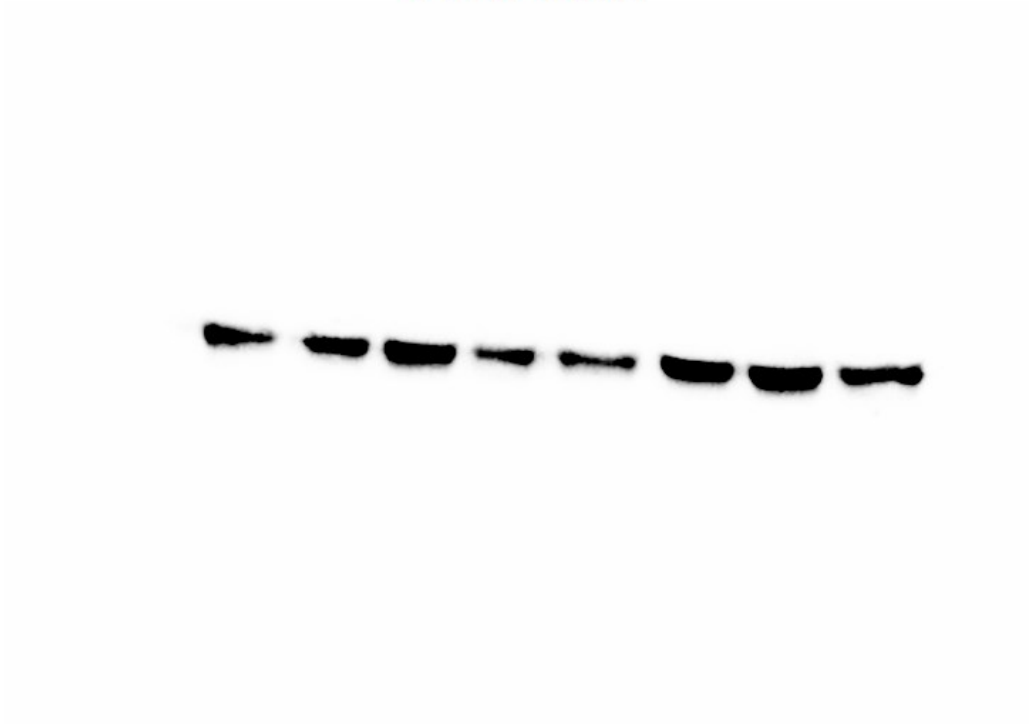

Supplement: d1mo00160d1.pdf [file d1mo00160d1.pdf]
