# Supplementary material for: Candidate kinases for adipogenesis and osteoblastogenesis from human bone marrow mesenchymal stem cells
Source: Royal Society of Chemistry journal article supplement (doi:10.1039/d1mo00160d), 2021-07-27
Supplement: d1mo00160d2.pdf [file d1mo00160d2.pdf]

1 **Supplementary materials Table S1** KEGG pathways separately for *PTK2B* a  
2 nd *PRKG2*.  
3

---

*PTK2B*

---

Calcium signaling pathway  
Chemokine signaling pathway  
GnRH signaling pathway  
Hepatitis B  
Human cytomegalovirus infection  
Human immunodeficiency virus 1 infection  
Leukocyte transendothelial migration  
Natural killer cell mediated cytotoxicity  
Phospholipase D signaling pathway  
Yersinia infection

---

*PRKG2*

---

cGMP-PKG signaling pathway  
Circadian entrainment  
Gap junction  
Long-term depression  
Olfactory transduction  
Platelet activation  
Regulation of lipolysis in adipocytes  
Renin secretion  
Salivary secretion  
Thermogenesis

---

**Supplementary materials Table S2** Primers in this study.

| Gene         | Product                                            | Forward primer (5'-3') | Reverse primer (5'-3') |
|--------------|----------------------------------------------------|------------------------|------------------------|
| <i>ACTB</i>  | Actin beta                                         | CGAGGACTTTGATTGCACATTG | AGAGAAGTGGGGTGGCTTTTAG |
| <i>ALPL</i>  | Alkaline phosphatase, biomineralization associated | TTTCTCTTGGGCAGGCAG     | GTTCCACGGAGGCTTCAG     |
| <i>FABP4</i> | Fatty acid binding protein 4                       | GAGAGGATGATAAACTGGTGGT | GAATGTTGTAGAGTTCAATGCG |
| <i>PPARG</i> | Peroxisome proliferator activated receptor gamma   | TGCAAGGGTTTCTTCCGG     | ATCCCCACTGCAAGGCAT     |
| <i>PRKG2</i> | Protein kinase cGMP-dependent 2                    | TGTGGCAAACCTGAACCG     | GGTTCTGGAATGGGGATG     |
| <i>PTK2B</i> | Protein tyrosine kinase 2 beta                     | TCAGGGGGAAGAAGCAGA     | GGGGTTGGGGAGAGAAAG     |
| <i>RUNX2</i> | RUNX family transcription factor 2                 | GGACCTGTGCTTCCTGCC     | TACTTGGTATACGGCCTTTAGA |
